# Supplementary material for: Memphis FitKids: implementing a mobile-friendly web-based application to enhance parents’ participation in improving child health
Source: Springer Nature journal article supplement (doi:10.1186/s12889-018-5968-6), 2018-08-29
Supplement: MOESM1 [file 16082362]

| FitCheck Questions                                                                                                       | Response Options                               |
|--------------------------------------------------------------------------------------------------------------------------|------------------------------------------------|
| Please enter the information below:                                                                                      | Enter child's name, Enter zip code (optional)  |
| How old is your child today?                                                                                             | Ages 2-20                                      |
| What is your child's gender?                                                                                             | Boy or Girl                                    |
| What is your child's weight and height?                                                                                  | Enter weight(lbs) Enter height                 |
| Each week, how many days does your child eat breakfast?                                                                  | 0, 1, 2, 3, 4, 5, 6, 7                         |
| Each week, how many times does your child eat fast food?                                                                 | 0-1, 2-4, 5+                                   |
| Each week, how many times does your family eat at the table together?                                                    | 0, 1, 2, 3, 4, 5, 6, 7+                        |
| Each week, does your child drink more than one regular soda, sweet tea, fruit punch, or "sports drink"?                  | Yes or No                                      |
| Most days, how many glasses of milk, cups of yogurt, or servings of cheese does your child eat or drink?                 | 0, 1, 2, 3, 4, 5                               |
| What kind of milk does your child drink?                                                                                 | Skim, 1%, 2%, whole, other, none               |
| Most days, does your child eat at least 5 servings of fruits and vegetables?                                             | Yes or no                                      |
| Most days, how much active play or sports does your child get, not counting time in school?                              | 0-30min, 30-1hr, 1+hrs                         |
| Most days, how much time does your child spend watching TV, playing video games, text messaging, and using the computer? | 0-1hr or 1+hrs                                 |
| Most weeks, how many times does your family do something active together, such as hiking, walking, biking, or gardening? | 0, 1, 2, 3, 4, 5, 6, 7                         |
| Does your child watch TV or use a computer in his/her bedroom?                                                           | Yes or No                                      |
| Most nights, what time does your child go to bed?                                                                        | 7pm, 8pm, 9pm, 10pm, 11pm, 12am, 1am, 2am, 3am |
| Most mornings, what time does your child wake up?                                                                        | 5am, 6am, 7am, 8am, 9am, 10am                  |

| FitCheck Recommendation Example                                                                                                                                                                                                                                                                                                                                                                                                                                                                                                                                                                                                                                                                                                                                                                                                                                                                                                                                                                                                                                                                                                                                                                                                           |
|-------------------------------------------------------------------------------------------------------------------------------------------------------------------------------------------------------------------------------------------------------------------------------------------------------------------------------------------------------------------------------------------------------------------------------------------------------------------------------------------------------------------------------------------------------------------------------------------------------------------------------------------------------------------------------------------------------------------------------------------------------------------------------------------------------------------------------------------------------------------------------------------------------------------------------------------------------------------------------------------------------------------------------------------------------------------------------------------------------------------------------------------------------------------------------------------------------------------------------------------|
| <p>"Try to eat a sit-down breakfast together with [Child's name]. You're [his/her] role model. If you're rushed in the morning, offer yogurt or milk, a low-fat granola or breakfast bar, a hard-boiled egg or low-fat cheese, and even dinner 'leftovers' like chicken, fish, beans, and rice. If time runs out before leaving for school or work, give [Child's name] breakfast to eat on the way." And for increasing physical activity, FitKids suggests: "Kids who are active do better in school. Physical education (P.E.) and recess during school hours are a start, but kids need more activity in their free time. To get [Child's name] moving more, try</p> <ul style="list-style-type: none"> <li>• Signing up [him/her] for recreational sports or a team,</li> <li>• Suggesting 15 minute bursts of playing ball, jumping roping, bike riding, or dog walking. Minutes add up!</li> <li>• Having [Child's name] join you on neighborhood walks or biking to the park.</li> </ul> <p>Make being active fun! Fitness adds up to good health. Check out the 'Healthy Community' link at <a href="http://memphisfitkids.org/">http://memphisfitkids.org/</a> for suggestions on where to be active in your neighborhood."</p> |
